# Supplementary material for: Nonthermal fluctuations of the mitotic spindle
Source: Royal Society of Chemistry journal article supplement (doi:10.1039/c5sm00149h), 2015-01-01
Supplement: c5sm00149h1.pdf [file c5sm00149h1.pdf]

## Experimental details

Genetic perturbations: For the motor mutants, the *cin8* and *kip1* deletion strains were tested in several different ways: PCR for the presence of the KAN gene in the *cin8* and *kip1* locus; PCR for the absence of a wildtype copy of *CIN8* and *KIP1*; and the most telling, a functional experiment: synthetic lethality of the *cin8/kip1* double mutant, having one marked with NAT, the other with KAN. In crossing the *cin8* strain to *kip1*, no spore was recovered that carried both mutations, of the approximately 60 tetrads tested, while all the other expected genotypes show up as expected, excluding the presence of a suppressor in either of the strains. Taken together, the PCR results verify that the deletions are present and that there is no wild type copy of either *kip1p* or *cin8p* present; and the crosses verify that these strains are synthetically lethal.

Fig. S1 shows that when we remove either of the two types of kinesin-5 tetrameric motors, *kip1* or *cin8*, using complete deletion of the gene, we find no statistically significant change in the observed spectrum.

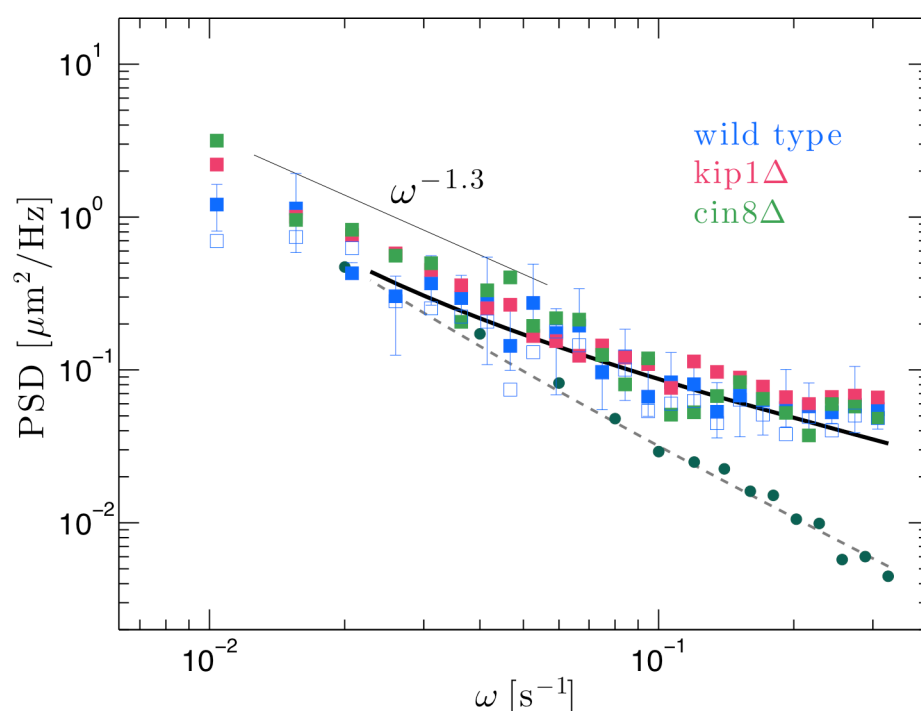

**Figure S1.** The *in vivo* PSD determined in metaphase for separate populations of cells lacking the gene for one or the other of the two types of kinesin-5 tetrameric motors, *kip1* and *cin8*, plotted together with the observed spectrum from unperturbed metaphase cells (Fig. 2) for comparison.
